# Supplementary material
Source: PubMed Central journal article supplement (PMC6954682)
Supplement: CEI-199-201-s013.pdf [file CEI-199-201-s013.pdf]

**Supplementary Table 3. Relationship between ILL abundance in sputum and clinical parameters.**

|                              | N (%)   | ILL                   |                        |                       |         | MAIT cells            |                        |                       |         | Vδ2+ T cells           |                        |                       |         |
|------------------------------|---------|-----------------------|------------------------|-----------------------|---------|-----------------------|------------------------|-----------------------|---------|------------------------|------------------------|-----------------------|---------|
|                              |         | Median                | 25th perc.             | 75th perc.            | P-value | Median                | 25th perc.             | 75th perc.            | P-value | Median                 | 25th perc.             | 75th perc.            | P-value |
| Gender                       |         |                       |                        |                       |         |                       |                        |                       |         |                        |                        |                       |         |
| Male                         | 25 (48) | 2.22x10 <sup>-8</sup> | 5.04x10 <sup>-9</sup>  | 3.73x10 <sup>-8</sup> | 0.67    | 6.85x10 <sup>-9</sup> | 1.00x10 <sup>-9</sup>  | 2.29x10 <sup>-8</sup> | 0.29    | 6.60x10 <sup>-9</sup>  | 1.00x10 <sup>-10</sup> | 1.58x10 <sup>-8</sup> | 0.64    |
| Female                       | 27 (52) | 1.41x10 <sup>-8</sup> | 1.76x10 <sup>-9</sup>  | 4.10x10 <sup>-8</sup> |         | 3.56x10 <sup>-9</sup> | 7.71x10 <sup>-10</sup> | 1.07x10 <sup>-8</sup> |         | 5.24x10 <sup>-9</sup>  | 7.05x10 <sup>-10</sup> | 2.13x10 <sup>-8</sup> |         |
| COPD/Structural lung disease |         |                       |                        |                       |         |                       |                        |                       |         |                        |                        |                       |         |
| No                           | 33 (65) | 1.87x10 <sup>-8</sup> | 4.94x10 <sup>-9</sup>  | 4.47x10 <sup>-8</sup> | 0.32    | 5.88x10 <sup>-9</sup> | 1.56x10 <sup>-9</sup>  | 2.35x10 <sup>-8</sup> | 0.28    | 7.21x10 <sup>-9</sup>  | 5.45x10 <sup>-10</sup> | 2.00x10 <sup>-8</sup> | 0.26    |
| Yes                          | 18 (35) | 1.54x10 <sup>-8</sup> | 1.41x10 <sup>-9</sup>  | 3.09x10 <sup>-8</sup> |         | 4.49x10 <sup>-9</sup> | 5.74x10 <sup>-10</sup> | 1.13x10 <sup>-8</sup> |         | 3.53x10 <sup>-9</sup>  | 1.00x10 <sup>-10</sup> | 1.44x10 <sup>-8</sup> |         |
| Asthma                       |         |                       |                        |                       |         |                       |                        |                       |         |                        |                        |                       |         |
| No                           | 41 (79) | 1.87x10 <sup>-8</sup> | 4.29x10 <sup>-9</sup>  | 4.82x10 <sup>-8</sup> | 0.22    | 6.40x10 <sup>-9</sup> | 9.96x10 <sup>-10</sup> | 1.97x10 <sup>-8</sup> | 0.53    | 7.24x10 <sup>-9</sup>  | 1.00x10 <sup>-10</sup> | 2.68x10 <sup>-8</sup> | 0.56    |
| Yes                          | 11 (21) | 7.69x10 <sup>-9</sup> | 1.44x10 <sup>-9</sup>  | 3.18x10 <sup>-8</sup> |         | 4.11x10 <sup>-9</sup> | 7.32x10 <sup>-10</sup> | 1.51x10 <sup>-8</sup> |         | 4.70x10 <sup>-9</sup>  | 7.05x10 <sup>-10</sup> | 1.44x10 <sup>-8</sup> |         |
| Duration of illness (days)   |         |                       |                        |                       |         |                       |                        |                       |         |                        |                        |                       |         |
| 1-2                          | 12 (24) | 2.23x10 <sup>-8</sup> | 6.57x10 <sup>-9</sup>  | 2.79x10 <sup>-8</sup> | 0.29    | 6.08x10 <sup>-9</sup> | 1.42x10 <sup>-9</sup>  | 1.41x10 <sup>-8</sup> | 0.41    | 7.17x10 <sup>-9</sup>  | 1.20x10 <sup>-10</sup> | 1.83x10 <sup>-8</sup> | 0.53    |
| 3-5                          | 21 (41) | 1.18x10 <sup>-8</sup> | 2.90x10 <sup>-9</sup>  | 4.10x10 <sup>-8</sup> |         | 4.05x10 <sup>-9</sup> | 3.34x10 <sup>-10</sup> | 1.34x10 <sup>-8</sup> |         | 6.60x10 <sup>-9</sup>  | 1.78x10 <sup>-9</sup>  | 1.45x10 <sup>-8</sup> |         |
| 6-8                          | 4 (8)   | 1.46x10 <sup>-9</sup> | 1.00x10 <sup>-10</sup> | 2.60x10 <sup>-8</sup> |         | 1.46x10 <sup>-9</sup> | 1.00x10 <sup>-10</sup> | 3.63x10 <sup>-8</sup> |         | 1.00x10 <sup>-10</sup> | 1.00x10 <sup>-10</sup> | 2.53x10 <sup>-8</sup> |         |
| >8                           | 14 (27) | 1.79x10 <sup>-8</sup> | 4.92x10 <sup>-9</sup>  | 8.93x10 <sup>-8</sup> |         | 8.27x10 <sup>-9</sup> | 1.05x10 <sup>-9</sup>  | 2.40x10 <sup>-8</sup> |         | 6.61x10 <sup>-9</sup>  | 7.67x10 <sup>-10</sup> | 3.64x10 <sup>-8</sup> |         |
| Antibiotics pre-admission    |         |                       |                        |                       |         |                       |                        |                       |         |                        |                        |                       |         |
| No                           | 38 (74) | 1.38x10 <sup>-8</sup> | 5.03x10 <sup>-9</sup>  | 3.55x10 <sup>-8</sup> | 0.91    | 5.49x10 <sup>-9</sup> | 1.13x10 <sup>-9</sup>  | 1.39x10 <sup>-8</sup> | 0.58    | 5.92x10 <sup>-9</sup>  | 4.61x10 <sup>-10</sup> | 2.05x10 <sup>-8</sup> | 0.73    |
| Yes                          | 14 (27) | 2.12x10 <sup>-8</sup> | 6.71x10 <sup>-10</sup> | 8.93x10 <sup>-8</sup> |         | 8.73x10 <sup>-9</sup> | 1.00x10 <sup>-10</sup> | 3.18x10 <sup>-8</sup> |         | 8.14x10 <sup>-9</sup>  | 1.00x10 <sup>-10</sup> | 1.89x10 <sup>-8</sup> |         |
| Sample type                  |         |                       |                        |                       |         |                       |                        |                       |         |                        |                        |                       |         |
| Expectorated                 | 43 (83) | 2.10x10 <sup>-8</sup> | 5.76x10 <sup>-9</sup>  | 4.86x10 <sup>-8</sup> | 0.06    | 6.76x10 <sup>-9</sup> | 1.13x10 <sup>-9</sup>  | 1.92x10 <sup>-8</sup> | 0.13    | 5.97x10 <sup>-9</sup>  | 1.79x10 <sup>-10</sup> | 2.60x10 <sup>-8</sup> | 0.20    |
| Induced                      | 9 (17)  | 1.05x10 <sup>-8</sup> | 4.81x10 <sup>-10</sup> | 1.38x10 <sup>-8</sup> |         | 3.26x10 <sup>-9</sup> | 4.16x10 <sup>-10</sup> | 6.04x10 <sup>-9</sup> |         | 6.60x10 <sup>-9</sup>  | 1.00x10 <sup>-10</sup> | 8.32x10 <sup>-9</sup> |         |
| Consolidation on chest x-ray |         |                       |                        |                       |         |                       |                        |                       |         |                        |                        |                       |         |
| Lobar                        | 31 (60) | 1.24x10 <sup>-8</sup> | 2.82x10 <sup>-9</sup>  | 4.07x10 <sup>-8</sup> | 0.76    | 4.93x10 <sup>-9</sup> | 1.11x10 <sup>-9</sup>  | 1.16x10 <sup>-8</sup> | 0.30    | 7.21x10 <sup>-9</sup>  | 1.79x10 <sup>-10</sup> | 1.81x10 <sup>-8</sup> | 0.61    |
| Multilobar                   | 21 (40) | 2.10x10 <sup>-8</sup> | 2.94x10 <sup>-9</sup>  | 4.10x10 <sup>-8</sup> |         | 1.02x10 <sup>-8</sup> | 8.16x10 <sup>-10</sup> | 2.33x10 <sup>-8</sup> |         | 4.20x10 <sup>-9</sup>  | 1.00x10 <sup>-10</sup> | 2.24x10 <sup>-8</sup> |         |
