# Supplementary material
Source: PubMed Central journal article supplement (PMC6954682)
Supplement: CEI-199-201-s014.pdf [file CEI-199-201-s014.pdf]

**Supplementary Table 4. Bacterial aetiology of pneumonia identified by routine diagnostic testing**

| Bacterial species               | Detection method     | n               |
|---------------------------------|----------------------|-----------------|
| <i>Legionella longbeachae</i>   | Sputum PCR only      | 6               |
|                                 | Sputum PCR + culture | 4               |
| <i>Streptococcus pneumoniae</i> | Sputum culture       | 3               |
|                                 | Blood culture        | 1               |
|                                 | Urine Antigen        | 3 <sup>*†</sup> |
| <i>Haemophilus influenzae</i>   | Sputum culture       | 3 <sup>†</sup>  |
| <i>Moraxella catarrhalis</i>    | Sputum culture       | 3 <sup>*</sup>  |
| <i>Staphylococcus aureus</i>    | Sputum culture       | 1               |
| <i>Pseudomonas aeruginosa</i>   | Sputum culture       | 1               |

\* Sputum culture grew *M. catarrhalis* and pneumococcal urinary antigen positive

† Sputum culture grew *H. influenzae* and pneumococcal urinary antigen positive
