# Supplementary material
Source: PubMed Central journal article supplement (PMC6954682)
Supplement: CEI-199-201-s015.pdf [file CEI-199-201-s015.pdf]

**Supplementary Table 5. Association between ILL abundance in sputum and the abundance of bacterial genes encoding for riboflavin synthesis and C5 isoprene synthesis**

|                                      | MAIT cells |         |         | V $\delta$ 2+ T cells |         |         |
|--------------------------------------|------------|---------|---------|-----------------------|---------|---------|
|                                      | Spearman r | P value | Q value | Spearman r            | P value | Q value |
| <b>Riboflavin KEGGs (M00125)</b>     |            |         |         |                       |         |         |
| K00794                               | 0.15       | 0.3     | 0.5     | 0.03                  | 0.84    | 0.98    |
| K00793                               | 0.23       | 0.1     | 0.38    | 0.09                  | 0.52    | 0.78    |
| K01498                               | NA         | NA      | NA      | NA                    | NA      | NA      |
| K01497                               | -0.23      | 0.1     | 0.38    | -0.27                 | 0.05    | 0.46    |
| K02858                               | -0.07      | 0.61    | 0.68    | 0                     | 0.98    | 0.98    |
| K11753                               | 0.12       | 0.4     | 0.51    | 0.21                  | 0.13    | 0.51    |
| K11752                               | 0.02       | 0.89    | 0.89    | -0.15                 | 0.27    | 0.51    |
| K14652                               | 0.14       | 0.33    | 0.5     | 0                     | 0.98    | 0.98    |
| K00861                               | -0.21      | 0.13    | 0.38    | -0.15                 | 0.28    | 0.51    |
| K00082                               | -0.17      | 0.24    | 0.5     | -0.18                 | 0.19    | 0.51    |
| <b>Non-Mevalonate KEGGs (M00096)</b> |            |         |         |                       |         |         |
| K01823                               | 0.12       | 0.38    | 0.44    | 0.09                  | 0.54    | 0.62    |
| K01662                               | -0.14      | 0.31    | 0.41    | -0.12                 | 0.4     | 0.53    |
| K00099                               | -0.25      | 0.08    | 0.25    | -0.24                 | 0.08    | 0.2     |
| K03527                               | -0.26      | 0.07    | 0.25    | -0.24                 | 0.08    | 0.2     |
| K03526                               | -0.24      | 0.09    | 0.25    | -0.23                 | 0.1     | 0.2     |
| K12506                               | -0.09      | 0.53    | 0.53    | -0.04                 | 0.79    | 0.79    |
| K01770                               | -0.21      | 0.14    | 0.26    | -0.19                 | 0.17    | 0.28    |
| K00919                               | -0.2       | 0.16    | 0.26    | -0.27                 | 0.06    | 0.2     |

Q value = Benjamini and Hochberg's FDR correction
